# Supplementary material for: Neoproterozoic–early Paleozoic provenance evolution of sedimentary rocks in and adjacent to the Farewell terrane (interior Alaska)
Source: Oxford University Press journal article supplement (doi:10.1130/ges01470.1), 2018-02-22
Supplement: ges01470_suppfiles.zip [file ges01470_suppfiles.zip]

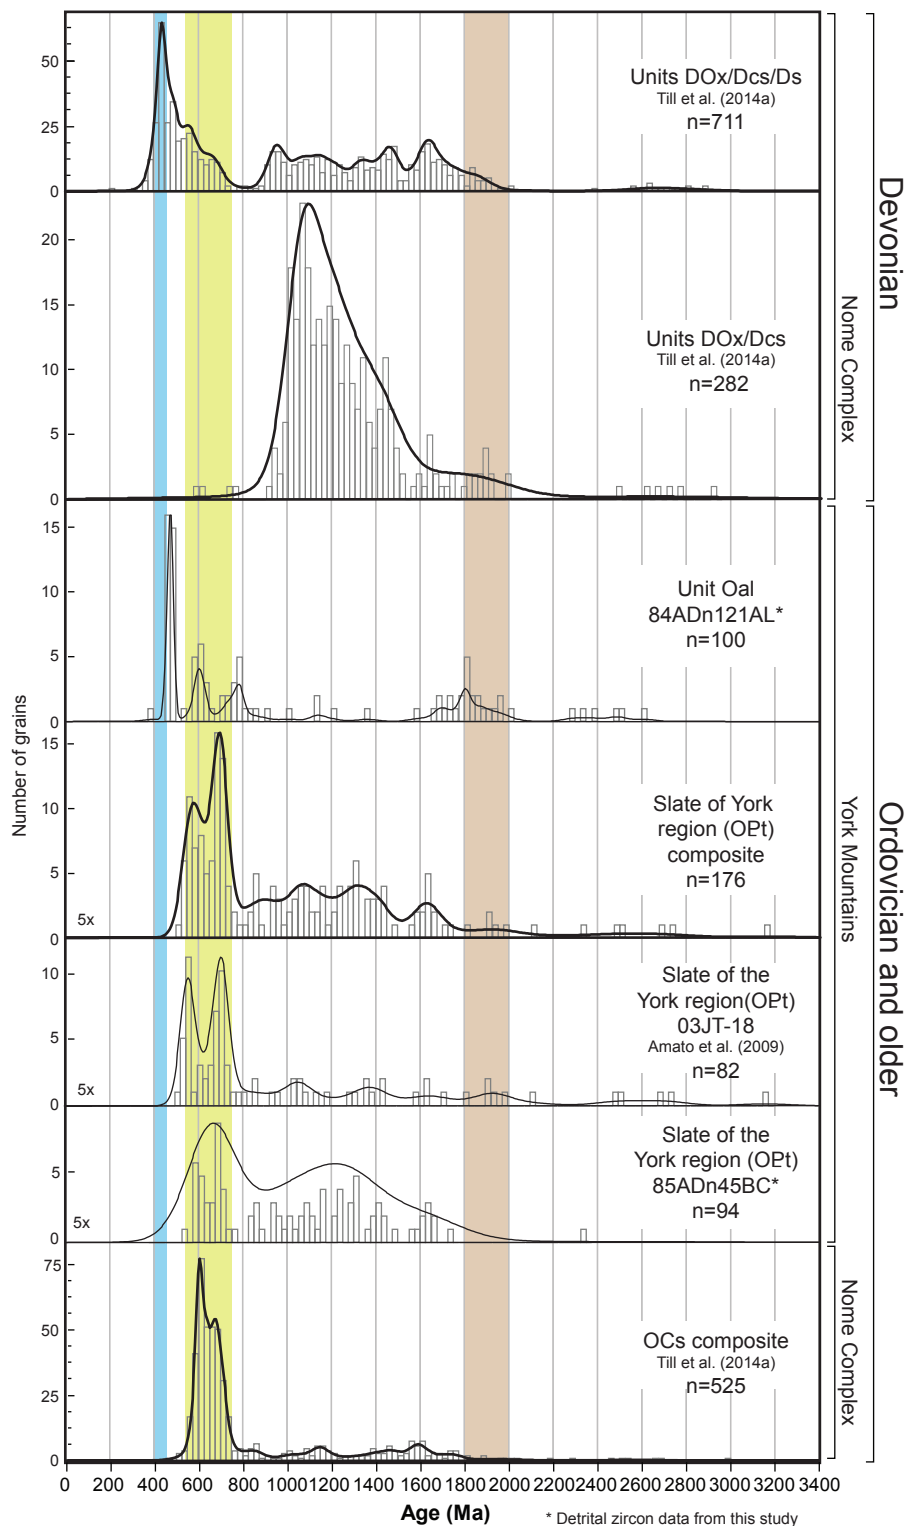

\* Detrital zircon data from this study (Table DR1); samples described in Dumoulin et al. (2014a) and in Table DR5
